# Supplementary material
Source: Springer Nature journal article supplement (https://www.springermedizin.de/resource/supplementary/12891_2010_1091_MOESM2_ESM.pdf/9507690)

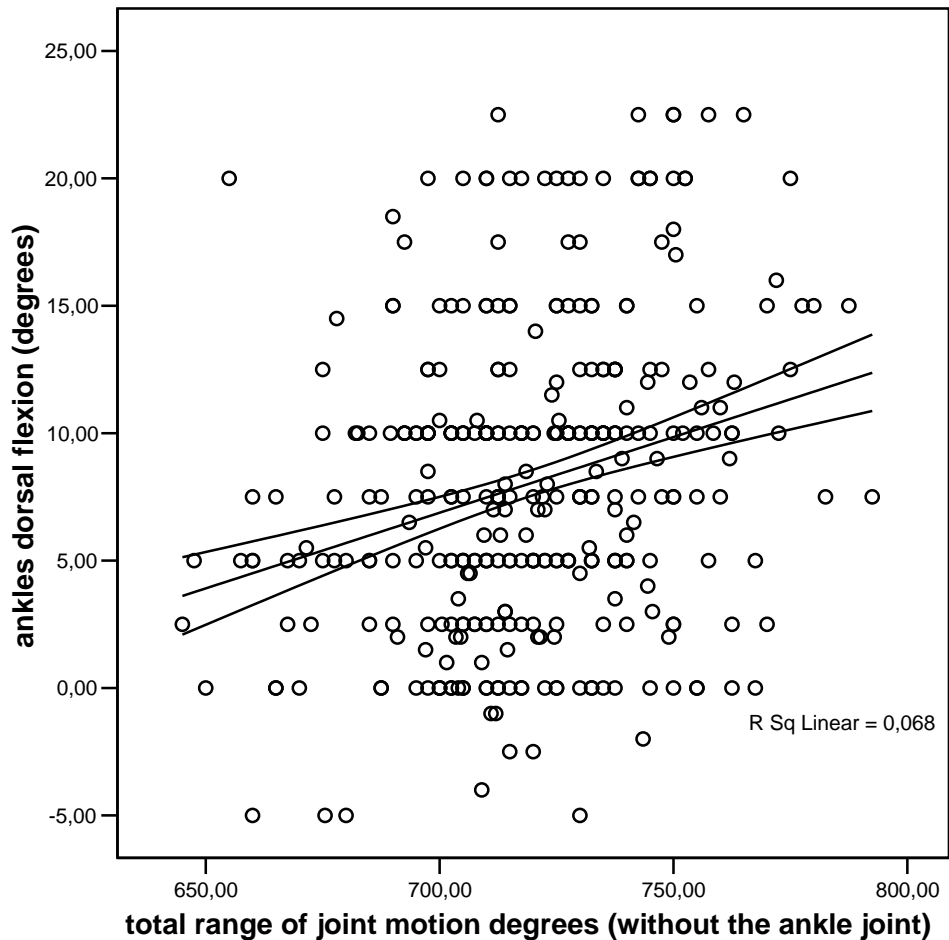

Supplement: MOESM2 [file 9507690]
